# Supplementary material for: An efficient, non-invasive approach for in-vivo sampling of hair follicles: design and applications in monitoring DNA damage and aging
Source: publisher site journal article supplement (doi:10.18632/aging.203744), 2021-12-06
Supplement: Supplementary file [file aging-v13i23-203744-supplementary-material-SD2.pdf]

## SUPPLEMENTARY TABLES

**Supplementary Table 1. Primers for PCR.**

| Type | Gene              | Forward primer 5' - 3'   | Reverse primer 5' - 3'    | Amplicon |
|------|-------------------|--------------------------|---------------------------|----------|
| mRNA | <i>HPRT</i>       | GGACAGGACTGAAAGACTTG     | TAATCCAGCAGGTCAGCAAA      | 114 bps  |
| mRNA | <i>p21</i>        | GCAAGAGAAAACCCTGAAGTG    | CACACAGAGTGAGGGCTAAG      | 100 bps  |
| mRNA | <i>SESNI</i>      | CCATAGGCCTTGCTGATTA      | TCCACACTGTGATTGCCATT      | 246 bps  |
| mRNA | <i>MDM2 X1</i>    | TGCAAGCACCTCACAGATTC     | ACACAATGTGCTGCTGCTTC      | 188 bps  |
|      | <i>MDM2 X1+X2</i> | ATGAATCCTCCCCTTCCATC     | CTGTCAGCTTTTTGCCATCA      | 169 bps  |
| DNA  | <i>APP</i>        | AGGACTGACCACTCGACCAG     | CGGGGGTCTAGTTCTGCAT       | 377 bps  |
| DNA  | <i>PST</i>        | AATAGAGAACGGCAGGAGCA     | GCCATGAGGGCACTAATCAT      | 608 bps  |
| DNA  | Internal control  | CTAGGCCACAGAATTGAAAGATCT | GTAGGTGGAAATTCTAGCATCATCC | 324 bps  |

Two pairs of primers were designed for MDM2. One (MDM2 X1) only covers transcript variant 1 (NM\_010786.4) and the other (MDM2 X1+X2) covers both known variants (NM\_001288586.2 as well as NM\_010786.4). Amplicon lengths for each marker were verified using an Agilent Bioanalyzer 2100 and Agilent DNA 1000 Kit. Primers for both transgenes (APP and PST) and internal controls were designed and their sequences were provided by the Jackson Laboratory.

**Supplementary Table 2. Primary antibodies.**

| Antigen | Species | Company                  | Catalog no. | Dilution | Application |
|---------|---------|--------------------------|-------------|----------|-------------|
| p16     | Mouse   | Santa Cruz Biotechnology | sc-1661     | 1:100    | IF          |
| H2AX    | Rabbit  | Cell Signaling           | #9718       | 1:400    | IF          |
| MDM2    | Mouse   | Abcam                    | ab16895     | 1:200    | IF          |
| p53     | Rabbit  | Santa Cruz Biotechnology | Sc-6243     | 1:100    | IF          |
| RPS6    | Rabbit  | Cell Signaling           | #2217       | 1:100    | IF          |
| RPL5    | Rabbit  | Cell Signaling           | #14568      | 1:100    | IF          |

**Supplementary Table 3. Secondary antibodies.**

| Host | Recognizes | Fluorophore     | Company      | Catalog no. | Dilution | Application |
|------|------------|-----------------|--------------|-------------|----------|-------------|
| Goat | Mouse IgG  | Alexa Fluor 488 | ThermoFisher | A-1101      | 1:1000   | IF          |
| Goat | Rabbit IgG | Alexa Fluor 488 | ThermoFisher | A-11034     | 1:1000   | IF          |
| Goat | Rabbit IgG | Alexa Fluor 488 | Abcam        | ab150077    | 1:1000   | IF          |
